# Supplementary material
Source: Springer Nature journal article supplement (https://www.springermedizin.de/resource/supplementary/12885_2014_4610_MOESM8_ESM.pdf/9466816)

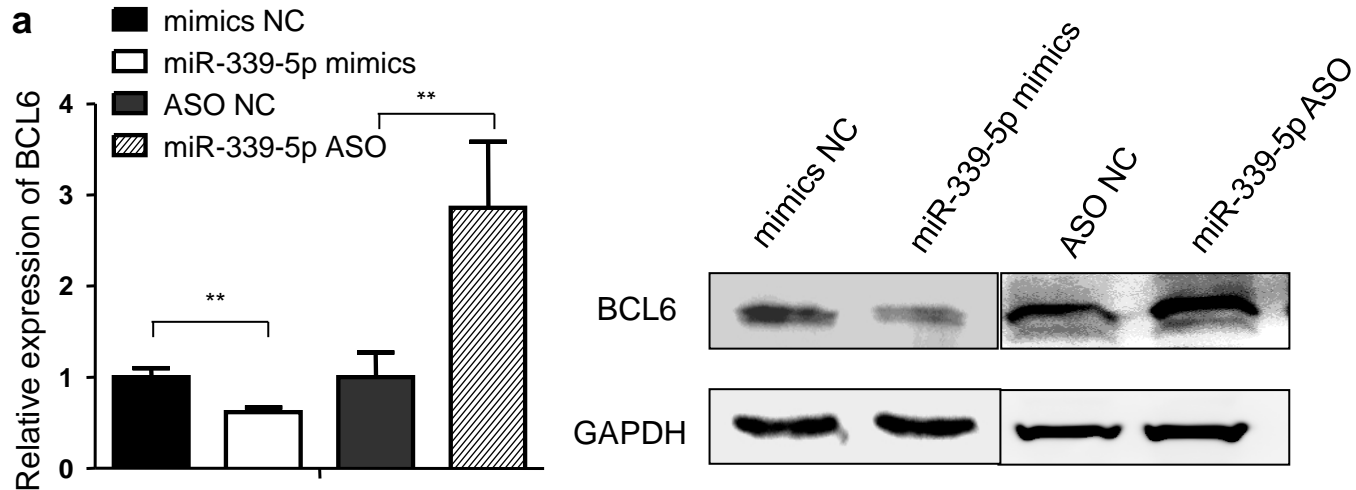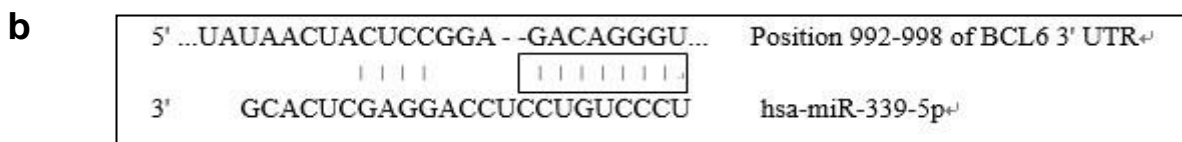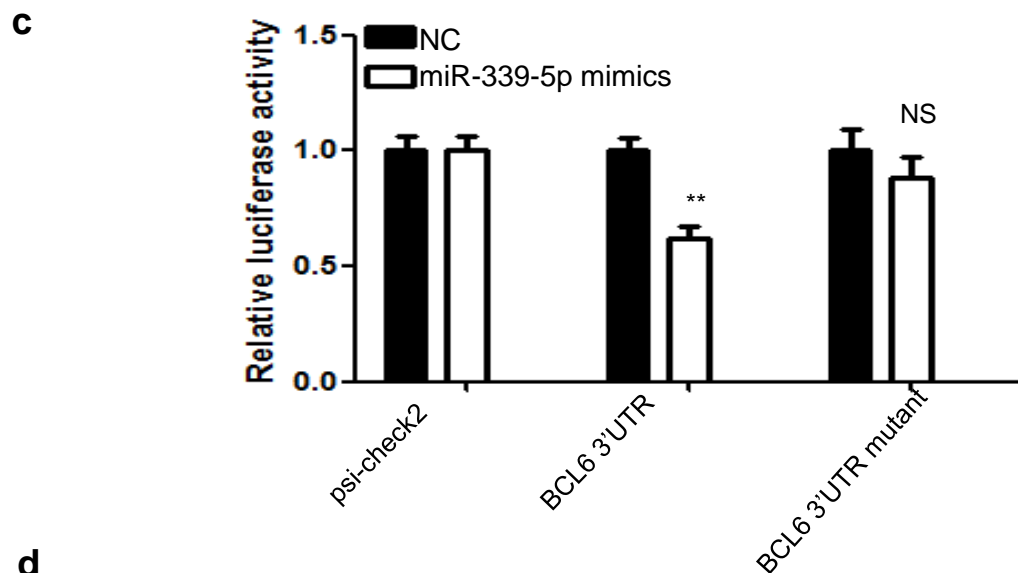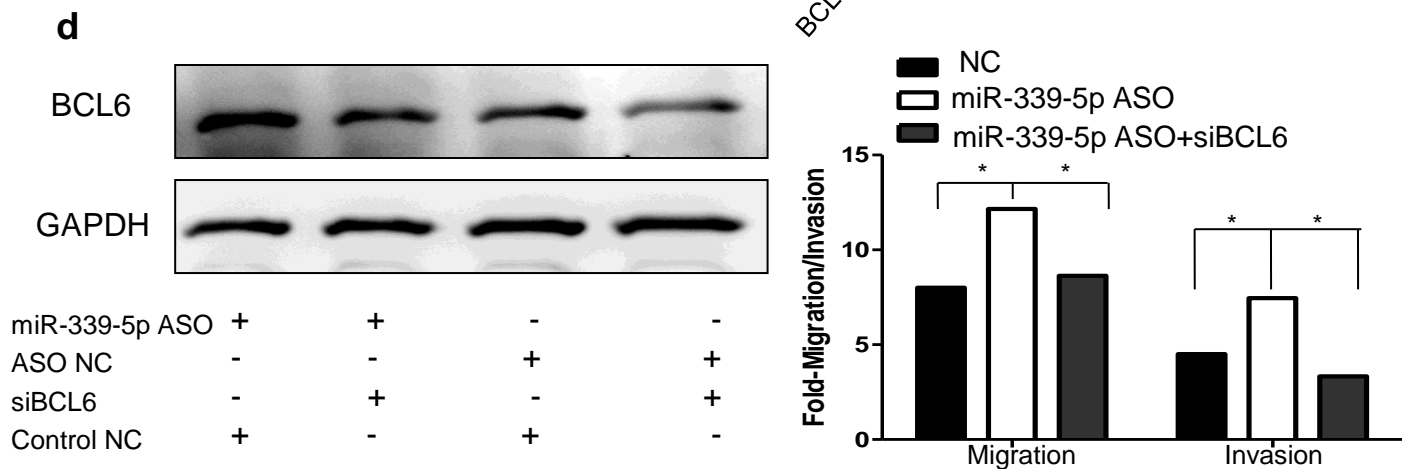

Supplement: MOESM8 [file 9466816]
